# Supplementary material for: Rationalising the difference in crystallisability of two sulflowers using efficient in silico methods
Source: Royal Society of Chemistry journal article supplement (doi:10.1039/d2ce00942k), 2022-01-01
Supplement: d2ce00942k1.pdf [file d2ce00942k1.pdf]

# Rationalising the difference in crystallisability of two Sulflowers using efficient in silico methods

## Supplementary Information

Isaac J. Sugden,<sup>\*‡a</sup> Nicholas F. Francia,<sup>b‡</sup> Torsten Jensen,<sup>c</sup> Claire S. Adjiman,<sup>b</sup> and Matteo Salvalaglio<sup>\*b</sup>

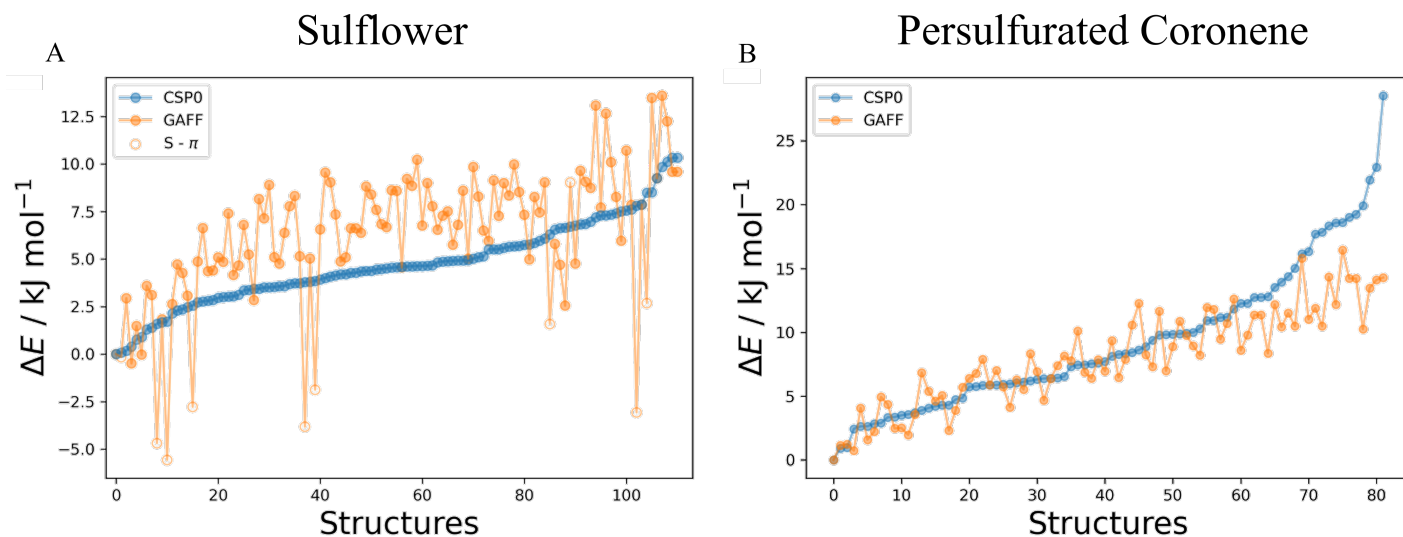

**Fig. 1** Comparison between the CSP\_0 (blue) and GAFF (orange) energies for the Sulflower and persulfurated coronene sets. Energies are rescaled with respect to the CSP\_0 global minimum. In the Sulflower plot, structures with edge-face interactions are shown with an empty circle.

<sup>a</sup> Molecular Systems Engineering Group, Department of Chemical Engineering, Sargent Centre for Process Systems Engineering, Institute for Molecular Science and Engineering, Imperial College London, London SW7 2AZ, United Kingdom

<sup>b</sup> Thomas Young Centre and Department of Chemical Engineering, University College London, London WC1E 7JE.

<sup>c</sup> School of Chemistry, University of Bristol, Cantock's Close, Bristol, BS8 1TS, UK.

\*i.sugden@imperial.ac.uk

\*m.salvalaglio@ucl.ac.uk

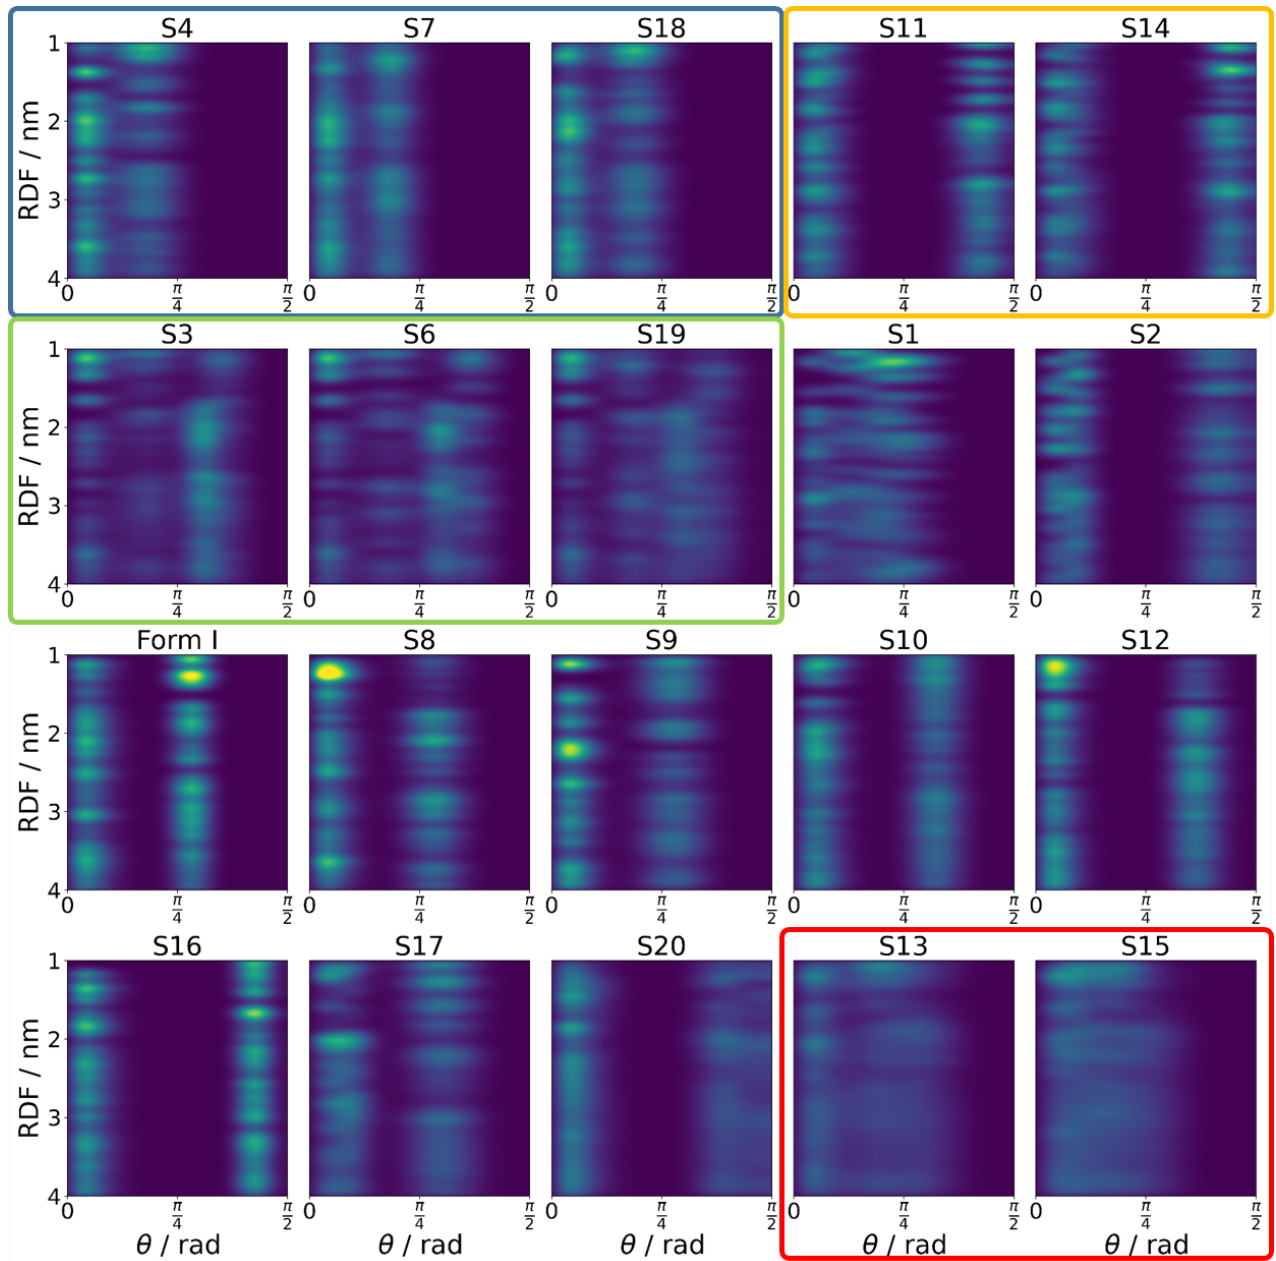

**Fig. 2** Fingerprints of the finite-temperature structures of Sulflower. Disordered structures are delimited with a red box. The different groups from the clustering analysis are shown in boxes of different colours.

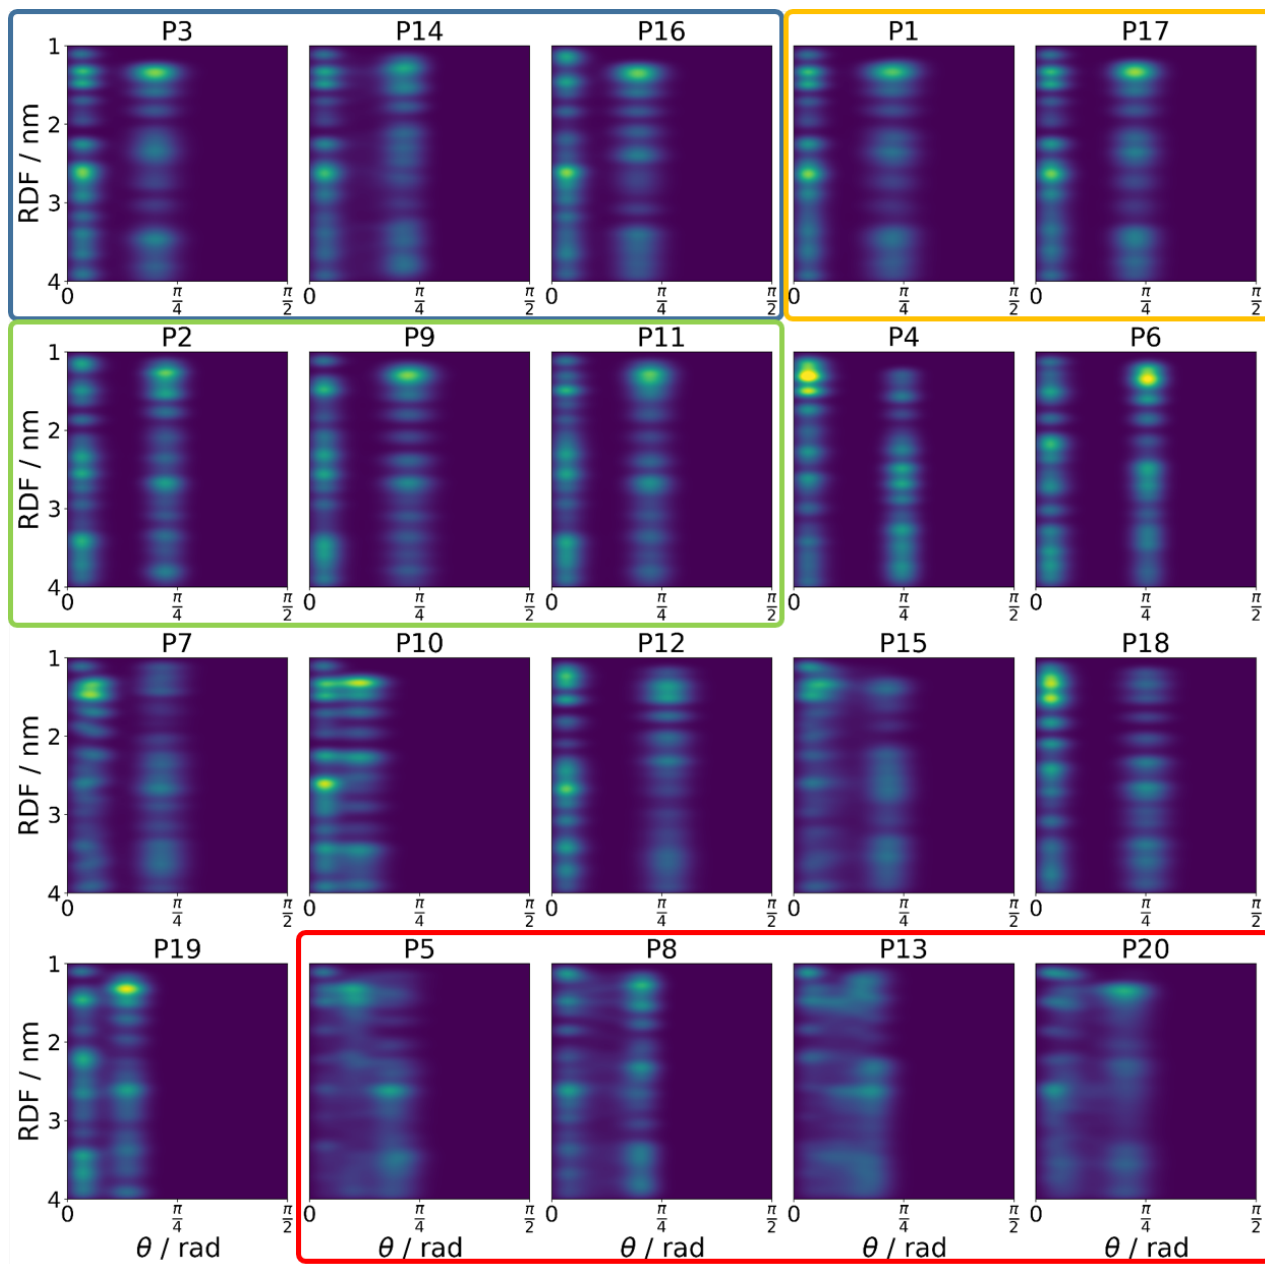

**Fig. 3** Fingerprints of the finite-temperature structures of persulfurated coronene. Disordered structures are delimited with a red box. The different groups from the clustering analysis are shown in boxes of different colours
